# Supplementary material
Source: PubMed Central journal article supplement (PMC6542555)
Supplement: NIHMS1015279-supplement-All_Suppl_Tables_and_Figures.pdf [file NIHMS1015279-supplement-All_Suppl_Tables_and_Figures.pdf]

Supplemental Table 1. Study quality of case-control studies by Newcastle–Ottawa Scale\*

| First author (year) | Is the case definition adequate? | Representativeness of the Cases? | Selection of Controls | Definition of Controls | Comparability of Cases and Controls on the Basis of the Design or Analysis | Ascertainment of exposure | Same method of ascertainment for cases and controls |
|---------------------|----------------------------------|----------------------------------|-----------------------|------------------------|----------------------------------------------------------------------------|---------------------------|-----------------------------------------------------|
| Haïssaguerre (2014) | ★                                | ★                                | ☆                     | ★                      | ★★                                                                         | ★                         | ★                                                   |
| Jadidi (2016)       | ★                                | ★                                | ☆                     | ★                      | ★                                                                          | ★                         | ★                                                   |
| Seitz (2017)        | ★                                | ★                                | ☆                     | ★                      | ★★                                                                         | ★                         | ★                                                   |

\* Wells GA, Shea B, O'Connell D, Peterson J, Welch V, et al.. (2011) The Newcastle-Ottawa Scale (NOS) for assessing the quality of nonrandomized studies in meta-analysis.

Available: [www.ohri.ca/programs/clinical\\_epidemiology/oxford.asp](http://www.ohri.ca/programs/clinical_epidemiology/oxford.asp).

Supplemental Table 2. Study quality of cohort studies by Newcastle–Ottawa Scale

| First author (year) | Is the case definition adequate? | Selection of the non-exposed cohort | Ascertainment of exposure | Demonstration that outcome of interest was not present at start of study | Comparability of cohorts on the basis of the design or analysis | Assessment of outcome | Was follow-up long enough for outcomes to occur |
|---------------------|----------------------------------|-------------------------------------|---------------------------|--------------------------------------------------------------------------|-----------------------------------------------------------------|-----------------------|-------------------------------------------------|
| Narayan (2012)      | ★                                | ★                                   | ★                         | ★                                                                        | ☆                                                               | ★                     | ★                                               |

Wells GA, Shea B, O'Connell D, Peterson J, Welch V, et al.. (2011) The Newcastle-Ottawa Scale (NOS) for assessing the quality of nonrandomized studies in meta-analysis.

Available: [www.ohri.ca/programs/clinical\\_epidemiology/oxford.asp](http://www.ohri.ca/programs/clinical_epidemiology/oxford.asp).

Supplemental Table 3. Study quality of randomized control studies by Cochrane Collaboration's tool

| First author (year) | Sequence generation | Allocation concealment | Blinding of participants, personnel and outcome assessors | Incomplete outcome data | Selective outcome reporting | Other sources of bias | Was follow-up long enough for outcomes to occur |
|---------------------|---------------------|------------------------|-----------------------------------------------------------|-------------------------|-----------------------------|-----------------------|-------------------------------------------------|
| Atienza (2014)      | Low                 | Low                    | Low                                                       | Low                     | Low                         | Low                   | Low                                             |
| Lin (2016)          | Low                 | Low                    | Low                                                       | Low                     | Low                         | Low                   | Low                                             |

The Cochrane Library [updated September 2006]. In: Higgins JPT, Green S, eds. Cochrane Handbook for Systematic Reviews of Interventions 4.2.6. Chichester, United Kingdom: John Wiley & Sons, Ltd; 2006.

## Supplemental Figure 1

### Persistent AF + Paroxysmal AF

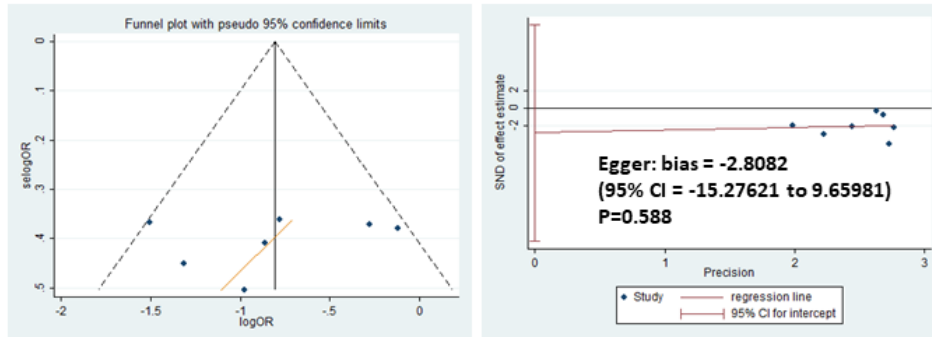

### Persistent AF

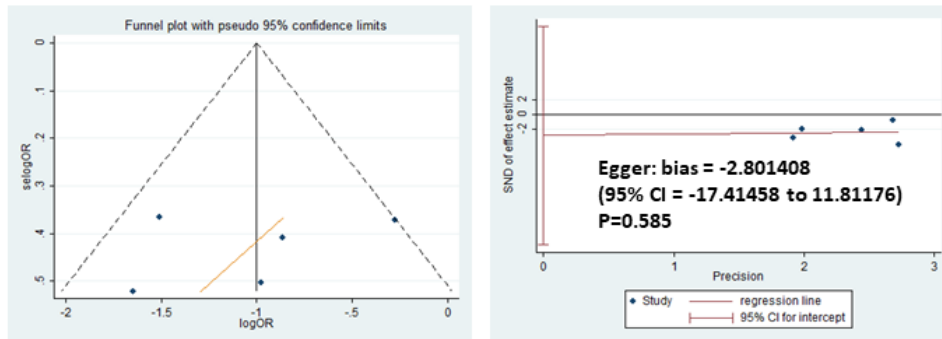

Legend:

Funnel plot and Egger's analysis of one-year freedom from AF/AT recurrence at 1 year with driver-guided versus conventional ablation for PAF plus PerAF patients (upper panel) and PerAF patient (lower panel).

AF: atrial fibrillation; PAF: paroxysmal AF; PerAF: persistent AF.

## Supplemental Figure 2

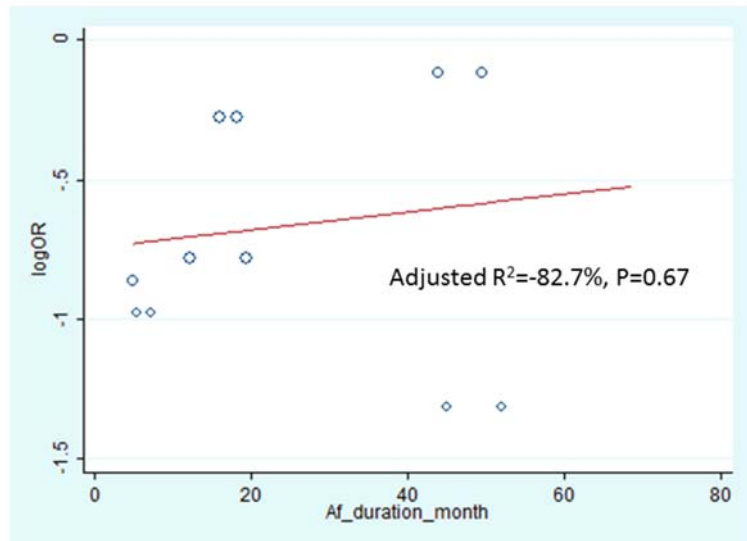

Meta-regression  
 REML estimate of between-study variance  
 % residual variation due to heterogeneity  
 Proportion of between-study variance explained  
 with Knapp-Hartung modification

Number of obs = 12  
 tau2 = .02237  
 I-squared\_res = 13.84%  
 Adj R-squared = -82.67%

| logor         | Coef.     | Std. Err. | t     | P> t  | [95% Conf. Interval] |
|---------------|-----------|-----------|-------|-------|----------------------|
| af_duration-h | .0032216  | .0072379  | 0.45  | 0.666 | -.0129054 .0193486   |
| _cons         | -.7446471 | .2116059  | -3.52 | 0.006 | -1.216134 -.2731598  |

### Legend

Meta-regression with the adjustment with heterogeneity of AF duration in the selected studies demonstrate no significant impact on the outcomes (adjusted R<sup>2</sup>= -82.7%, P=0.67).
